# Supplementary material
Source: PubMed Central journal article supplement (PMC4154311)
Supplement: NIHMS614093-supplement-01.pdf [file NIHMS614093-supplement-01.pdf]

## Supplementary appendix

This appendix formed part of the original submission and has been peer reviewed. We post it as supplied by the authors.

Supplement to: Kerem E, Konstan MW, De Boeck K, et al, for the Cystic Fibrosis Ataluren Study Group. Ataluren for the treatment of nonsense-mutation cystic fibrosis: a randomised, double-blind, placebo-controlled phase 3 trial. *Lancet Respir Med* 2014; published online May 16. [http://dx.doi.org/10.1016/S2213-2600\(14\)70100-6](http://dx.doi.org/10.1016/S2213-2600(14)70100-6).

## Supplementary Appendix

### Patient Eligibility

#### *Inclusion criteria*

All patients had submitted a signed informed consent/assent; were  $\geq 6$  years of age; had body weight  $\geq 16$ kg; exhibited abnormal NPD total chloride conductance (a less electrically negative value than  $-5$  mV for total chloride conductance [ $\Delta$ chloride-free+isoproterenol]); had sweat chloride  $>40$  mEq/L; had documentation of the presence of a nonsense mutation in at least 1 allele of the CFTR gene; verification that a blood sample had been drawn for sequencing of the CFTR gene; had ability to perform a valid, reproducible spirometry test that demonstrated an FEV<sub>1</sub>  $\geq 40\%$  and  $\leq 90\%$  of predicted for age, gender, and height<sup>16,17</sup>; resting oxygen saturation measured by pulse oximetry  $\geq 92\%$  room air; VivoMetrics documentation showing completed 24-hour LifeShirt cough frequency assessment; confirmed screening laboratory values within pre-specified central laboratory ranges for hepatic, adrenal, and renal organ systems, as well as serum electrolytes and pregnancy test; willingness to abstain from sexual intercourse or employ contraception during the study; willingness and ability to comply with scheduled visits, drug administration plan, study restrictions, and study procedures.

#### *Exclusion criteria*

Patients were excluded from study participation if they had a known hypersensitivity to ataluren; exposure to another investigational drug or any change in a chronic treatment or prophylaxis regimen for CF within 4 weeks of starting study treatment; ongoing participation in any other clinical trial; systemic aminoglycoside antibiotics treatment within 2 weeks before the date of

baseline NPD assessment; intravenous antibiotic treatment within 3 weeks prior to start of study treatment; ongoing immunosuppressive (non-corticosteroid), warfarin, phenytoin, or tolbutamide therapy; history of solid organ or hematological transplantation; major complications of lung disease within 8 weeks prior to start of study; pulmonary exacerbation or acute respiratory tract infection within 3 weeks before randomization; known portal hypertension; positive hepatitis B, hepatitis C, or human immunodeficiency virus test; pregnancy or breast-feeding; current smoker or smoking history of  $\geq 10$  pack-years (number of cigarette packs/day  $\times$  number of years smoked); prior or ongoing medical condition that in the investigator's opinion, could have adversely affected the safety of the patient, or could impair study results assessment; and history of Grade  $\geq 3$  creatinine elevation due to aminoglycoside nephrotoxicity. Patients had the right to withdraw from the study at any time and for any reason. Patients could also be withdrawn based on worsening of their condition, investigator judgment, study protocol compliance, toxicity, broken blind, study discontinuation, and if ataluren became commercially available, in which case the patients would be transitioned to commercial drug supply.

### **Baseline Characteristics by Stratification Factors**

Three stratification factors (use of inhaled aztreonam and/or aminoglycoside antibiotics [yes vs no], baseline age [ $< 18$  years vs  $\geq 18$  years], and baseline % predicted FEV<sub>1</sub> [ $< 65\%$  vs  $\geq 65\%$ ]) were included to balance allocation of patients into treatment groups by these parameters which had potentially important effects. The allocation of patients into each strata is summarized in Supplementary Table 1.

### **Supplementary Table 1: Patient Distribution by Study Stratification Factors and Genotype (ITT)**

| Stratification Factor                         | Treatment Arm |             |
|-----------------------------------------------|---------------|-------------|
|                                               | Ataluren      | Placebo     |
|                                               | N=116         | N=116       |
| Chronic inhaled antibiotic use, n (%)         |               |             |
| Yes                                           | 64 (55.2%)    | 63 (54.3%)  |
| No                                            | 52 (44.8%)    | 53 (45.7%)  |
| Age group, n (%)                              |               |             |
| <18 y                                         | 38 (32.8%)    | 37 (31.9%)  |
| ≥18 y                                         | 78 (67.2%)    | 79 (68.1%)  |
| Baseline % predicted FEV <sub>1</sub> , n (%) |               |             |
| ≥40 to <65%                                   | 64 (55.2%)    | 74 (63.8%)  |
| ≥65 to ≤90%                                   | 52 (44.8%)    | 42 (36.2%)  |
| Premature stop codon type                     |               |             |
| UGA                                           | 110 (94.8%)   | 106 (91.4%) |
| UAG                                           | 12 (10.3%)    | 11 (9.5%)   |
| UAA                                           | 11(9.5%)      | 14 (12.1%)  |

**Abbreviation:** FEV<sub>1</sub> = forced expiratory volume in 1 second

Types of inhaled antibiotics used were primarily aminoglycosides (tobramycin in all cases), colistin, and aztreonam (Supplementary Table 2). The treatment arms were balanced with regard to inhaled antibiotic use overall and generally balanced by type.

**Supplementary Table 2: Inhaled Antibiotic Use at Randomization (ITT Population)**

| Characteristic                 | Treatment Arm |            |
|--------------------------------|---------------|------------|
|                                | Ataluren      | Placebo    |
|                                | N=116         | N=116      |
| Any antibiotic(s) <sup>a</sup> | 64 (55.2%)    | 63 (53.4%) |
| Aminoglycoside (tobramycin)    | 44 (37.9%)    | 42 (35.6%) |
| Colistin                       | 30 (25.9%)    | 22 (18.6%) |
| Aztreonam                      | 10 (8.3%)     | 8 (6.8%)   |

<sup>a</sup> A patient was considered to be using inhaled antibiotics at baseline even if the patient was in the “off” portion of an intermittent cycling regimen. Patients may have been using >1 antibiotic at baseline.

The subgroups of patients not using chronic inhaled tobramycin and those using chronic inhaled tobramycin at baseline had generally similar demographics at baseline (Supplementary Table 3).

**Supplementary Table 3: Patient Demographics by aminoglycoside use (ITT Population)**

| Baseline Characteristic      | Aminoglycosides = No |              | Aminoglycosides = Yes |              |
|------------------------------|----------------------|--------------|-----------------------|--------------|
|                              | Ataluren             | Placebo      | Ataluren              | Placebo      |
|                              | N=72                 | N=74         | N=44                  | N=42         |
| Age, years                   |                      |              |                       |              |
| Mean (SD)                    | 24.3 (11.31)         | 23.7 (10.20) | 20.5 (7.54)           | 22.3 (7.56)  |
| Median                       | 22.5                 | 22.0         | 20.5                  | 22.0         |
| Range                        | 6, 49                | 8, 53        | 6, 48                 | 8, 45        |
| Sex, n (%)                   |                      |              |                       |              |
| Male                         | 35 (48.6%)           | 32 (43.2%)   | 25 (56.8%)            | 26 (61.9%)   |
| Female                       | 37 (51.4%)           | 42 (56.7%)   | 19 (43.2%)            | 16 (38.1%)   |
| Body weight, kg              |                      |              |                       |              |
| Mean (SD)                    | 53.2 (14.16)         | 55.7 (13.68) | 53.9 (13.73)          | 56.5 (12.30) |
| Median                       | 53.5                 | 56.8         | 55.1                  | 58.0         |
| Range                        | 22, 105              | 28, 93       | 21, 80                | 24, 92       |
| % predicted FEV <sub>1</sub> |                      |              |                       |              |
| Mean (SD)                    | 61.6 (13.11)         | 60.5 (15.68) | 62.8 (14.52)          | 59.8 (14.32) |
| Median                       | 62.9                 | 59.7         | 63.9                  | 58.3         |
| Range                        | 39.4, 89.7           | 36.2, 88.3   | 38.4, 90.3            | 40.1, 92.6   |
| Sweat chloride               |                      |              |                       |              |
| Mean (SD)                    | 98.3 (15.66)         | 96.9 (16.59) | 103.3 (10.91)         | 96.0 (14.86) |
| Median                       | 101.0                | 100.5        | 102.5                 | 98.0         |
| Range                        | 22.5, 116.0          | 22.0, 117.5  | 82.5, 128.0           | 49.0, 116.0  |

A total of 34 patients discontinued participation prior to completion of 48 weeks of blinded treatment. The reasons for these discontinuations are summarized in Supplementary Table 4.

**Supplementary Table 4: Reasons for Study Discontinuation (All Patients)**

| Reason            | Treatment Arm |           |
|-------------------|---------------|-----------|
|                   | Ataluren      | Placebo   |
|                   | N=120         | N=116     |
| Adverse Event     | 7 ( 5.8%)     | 2 ( 1.7%) |
| Lost to Follow-up | 1 ( 0.8%)     | 0         |

|                        |           |           |
|------------------------|-----------|-----------|
| Withdrew Consent       | 9 ( 7.5%) | 9 ( 7.6%) |
| Investigator Decision  | 1 ( 0.8%) | 0         |
| Protocol Noncompliance | 1 ( 0.8%) | 1 ( 0.8%) |
| Other                  | 1 ( 0.8%) | 2 ( 1.7%) |

### Additional spirometry data

Changes in % predicted forced vital capacity (FVC) as a secondary endpoint, and changes in % predicted forced expiratory flow between 25-75% (FEF<sub>25-75</sub>), as a tertiary endpoint, were analyzed via repeated-measures analysis of co-variance (RANCOVA) in combination with an unpaired t-test comparing ataluren with placebo at Week 48.

The pattern of changes in % predicted FVC and % predicted FEF<sub>25-75</sub> were similar to that observed for % predicted FEV<sub>1</sub>, ie, a smaller decline over 48 weeks was seen in ataluren-treated patients compared to placebo (Supplementary Figure 1).

### Supplementary Figure 1: Mean Changes in % predicted FVC and FEF<sub>25-75</sub> by Visit (ITT Population)

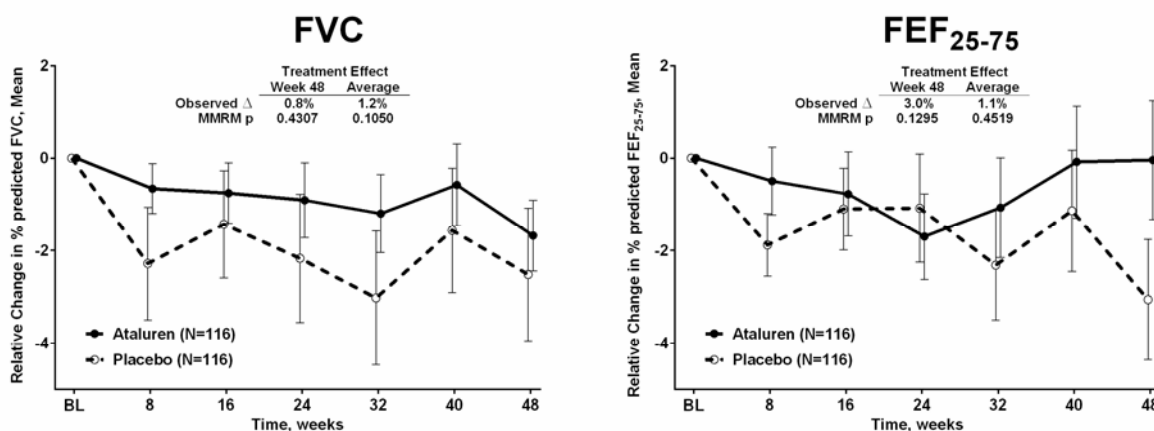

The plotted values represent observed data ( $\pm$ SEM).

The p-values were obtained from mixed-model repeated measures (MMRM) analyses. Covariates were baseline % predicted FVC (or FEF<sub>25-75</sub>), treatment, visit, treatment-by-visit interaction, baseline FVC (or FEF<sub>25-75</sub>)-by-visit interaction, and the stratification factors of baseline inhaled antibiotics (yes vs no), baseline age (<18 vs  $\geq$ 18 years), and baseline % predicted FEV<sub>1</sub> (40 to <65% vs  $\geq$ 65 to 90%).

**Abbreviations:** FEF<sub>25-75</sub> = forced expiratory flow between 25% and 75% of expiration, FEV<sub>1</sub> = forced expiratory volume in 1 second, FVC = forced vital capacity, ITT = intent-to-treat, MMRM = mixed-model repeated-measures

### **Additional pulmonary exacerbation data**

Pulmonary exacerbation was defined in a number of ways in this study (Supplementary Table 5).

Fuchs' criteria defines a pulmonary exacerbation as an event requiring treatment with parenteral antibiotics for any four of the following 12 symptoms<sup>20</sup>: change in sputum; new or increased hemoptysis; increased cough; increased dyspnea; fatigue; temperature >38°C; anorexia; sinus pain; change in sinus discharge; change in physical examination of the chest; decrease in pulmonary function by 10 percent or more from a previously recorded value; or radiographic changes indicative of pulmonary function. Modified Fuchs' criteria, the primary definition used in this study, is primarily a symptom based definition and comprises the same Fuchs signs and symptoms criteria without the requirement for treatment with antibiotics. In contrast, the expanded Fuchs' criteria requires the use of any form of antibiotic treatment (inhaled, oral, or intravenous) in addition to the presence of at least 4 of 12 Fuchs' signs and symptoms. The investigator assessment of the occurrence of a pulmonary exacerbation was recorded in respiratory events forms, which also documented the signs and symptoms associated with the event. The investigator determination was based on the individual physician's clinical judgment and did not require meeting any specific criteria.

**Supplementary Table 5: Definitions of Pulmonary Exacerbation**

| <b>Definition*</b>                     | <b>Presence of <math>\geq 4</math> of 12 Fuchs' Signs and Symptoms</b> | <b>Use of IV Antibiotics</b> | <b>Use of Any Antibiotics (oral, inhaled, or IV)</b> |
|----------------------------------------|------------------------------------------------------------------------|------------------------------|------------------------------------------------------|
| Fuchs                                  | Yes                                                                    | Yes                          | NA                                                   |
| Modified Fuchs<br>(primary definition) | Yes                                                                    | No                           | No                                                   |
| Expanded Fuchs                         | Yes                                                                    | No                           | Yes                                                  |
| Investigator assessment                | No                                                                     | No                           | No                                                   |

\*Indicates criteria that must be met in order for an event to be counted as an exacerbation

Ataluren showed positive trends in all three Fuchs-related definitions of pulmonary exacerbation, but the results were not statistically significant (Supplementary Table 6).

**Supplementary Table 6: Summary of Pulmonary Exacerbation Rate Over 48 Weeks for Different Definitions of Pulmonary Exacerbation (ITT)**

| Definition              | Treatment Arm     |                   | Rate Ratio        |
|-------------------------|-------------------|-------------------|-------------------|
|                         | Ataluren          | Placebo           |                   |
| Modified Fuchs'         |                   |                   |                   |
| Estimated rate (95% CI) | 1.42 (1.05, 1.79) | 1.78 (1.38, 2.17) | 0.77 (0.57, 1.05) |
| p-value <sup>a</sup>    | --                | --                | 0.0992            |
| Expanded Fuchs'         |                   |                   |                   |
| Estimated rate (95% CI) | 1.32 (0.96, 1.68) | 1.60 (1.22, 1.98) | 0.79 (0.57, 1.10) |
| p-value <sup>a</sup>    | --                | --                | 0.16              |
| Fuchs'                  |                   |                   |                   |
| Estimated rate (95% CI) | 0.98 (0.65, 1.30) | 1.13 (0.80, 1.44) | 0.86 (0.31, 1.14) |
| p-value <sup>a</sup>    | --                | --                | 0.12              |
| Investigator judgment   |                   |                   |                   |
| Estimated rate (95% CI) | 2.26 (1.83, 2.69) | 2.28 (1.88, 2.86) | 0.94 (0.74, 1.18) |
| p-value <sup>a</sup>    | --                | --                | 0.52              |
| Patient self-report     |                   |                   |                   |
| Estimated rate (95% CI) | 1.98 (1.50, 2.46) | 1.79 (1.39, 2.21) | 1.13 (0.79, 1.62) |
| p-value <sup>a</sup>    | --                | --                | 0.51              |

<sup>a</sup> The p-values were obtained from a negative binomial regression analysis. Covariates were treatment and stratification factors of chronic inhaled antibiotic use (yes vs no), age (<18 vs ≥18 years), and baseline % predicted FEV<sub>1</sub> (≥40 to <65% vs ≥65 to ≤90%).

**Abbreviations:** CI = confidence interval, FEV<sub>1</sub> = forced expiratory volume in 1 second, ITT = intent-to-treat population

The time to first and second pulmonary exacerbation based on modified Fuchs' criteria was analyzed in the intent-to-treat population. The median (CI) time to first pulmonary exacerbation in the ataluren arm was 197 (147 to 314) days vs 172 (112 to 230) days in placebo (p=0.3861). The median time to second pulmonary exacerbation data could not be calculated. The 25% quartile (CI) time to second pulmonary exacerbation was 273 (221 to NA) days in the ataluren arm vs 195 (138 to 310) days in placebo (p=0.1290).



## Tertiary and other endpoints

### *Sweat Chloride*

At baseline, mean sweat chloride concentration was 100.1 mmol/L for ataluren and 96.6 mmol/L for placebo (Supplementary Table 7). The mean change in sweat chloride concentration from baseline to Week 48 was -1.3 mmol/L for ataluren and -0.6 mmol/L for placebo. Thus, the difference between ataluren and placebo in mean change in sweat chloride concentration from baseline to Week 48 was 0.7 mmol/L (p=0.9919).

**Supplementary Table 7: Summary of Sweat Chloride Concentration at Baseline and Week 48 (ITT Population)**

| Visit/Parameter, mmol/L       | Treatment Arm |              |
|-------------------------------|---------------|--------------|
|                               | Ataluren      | Placebo      |
| Baseline, N                   | 114           | 111          |
| Mean (SD)                     | 100.1 (14.22) | 96.6 (15.93) |
| Median                        | 101.5         | 100.0        |
| Minimum, maximum              | 22.5, 128.0   | 22.0, 117.5  |
| Week 48, N                    | 98            | 102          |
| Mean (SD)                     | 100.1 (13.35) | 96.7 (17.20) |
| Median                        | 101.3         | 101.5        |
| Minimum, maximum              | 30.0, 127.5   | 38.5, 126.5  |
| Δ from baseline to Week 48, N | 97            | 97           |
| Mean (SD)                     | -1.3 (8.94)   | -0.6 (10.27) |
| Median                        | -1.0          | 0.0          |
| Minimum, maximum              | -31.5, 16.0   | -52.0, 19.0  |
| p-value <sup>a</sup>          | 0.9919        |              |

<sup>a</sup>The p-value was obtained from an MMRM analysis. Covariates were baseline sweat chloride concentration, treatment, visit, treatment-by-visit interaction, baseline sweat chloride concentration-by-visit interaction, and the stratification factors of baseline inhaled antibiotics (yes vs no), baseline age (<18 vs ≥18 years), and baseline % predicted FEV<sub>1</sub> (40 to <65% vs ≥65 to 90%).

**Abbreviations:** FEV<sub>1</sub> = forced expiratory volume in 1 second, ITT = intent-to-treat, MMRM = mixed-model repeated measures, SD = standard deviation

### *Sweat Chloride Sensitivity Analysis*

Analysis was also performed for change from baseline in sweat chloride concentration excluding patients with baseline <40 mmol/L in the intent-to-treat population. The overall difference in the ataluren arm vs placebo was -0.62 and was not statistically significant ( $p = 0.9423$ ).

### *Nasal Transepithelial Potential Difference*

Total chloride transport (the change induced by zero chloride plus isoproterenol) was assessed by NPD. At baseline, mean total chloride transport was similar in the ataluren and placebo arms (Supplementary Table 8). The mean change in total chloride transport from baseline to Week 48 was 0.31 mV for ataluren vs 0.14 mV for placebo, resulting in a small, non-meaningful difference between treatment arms.

**Supplementary Table 8: Summary of Total Chloride Transport at Baseline and Week 48 (ITT Population)**

| Total Chloride Transport,<br>Visit/Parameter, mV | Treatment Arm |               |
|--------------------------------------------------|---------------|---------------|
|                                                  | Ataluren      | Placebo       |
| Baseline, N                                      | 116           | 116           |
| Mean (SD)                                        | 1.58 (3.88)   | 1.95 (3.55)   |
| Median                                           | 1.69          | 1.85          |
| Minimum, maximum                                 | -5.82, 11.36  | -6.26, 12.33  |
| Week 48, N                                       | 100           | 104           |
| Mean (SD)                                        | 1.72 (4.19)   | 1.99 (4.65)   |
| Median                                           | 1.61          | 2.32          |
| Minimum, maximum                                 | -10.65, 15.39 | -8.64, 17.64  |
| $\Delta$ from baseline to Week 48, N             | 100           | 104           |
| Mean (SD)                                        | 0.31 (5.06)   | 0.14 (5.81)   |
| Median                                           | 0.678         | 1.133         |
| Minimum, maximum                                 | -14.95, 11.48 | -16.07, 19.29 |
| p-value <sup>b</sup>                             | 0.8587        |               |

<sup>a</sup>The centrally read results of an unblinded reader were used for eligibility assessment of 2 patients whose centrally analyzed blinded NPD reading was subsequently found to be more electrically negative than -5 mV for total chloride conductance [ $\Delta$ chloride-free+isoproterenol].

<sup>b</sup>The p-value was obtained from an MMRM analysis. Covariates were baseline total chloride transport, treatment, visit, treatment-by-visit interaction, baseline total chloride transport-by-visit interaction, and the stratification factors of baseline inhaled antibiotics (yes vs no), baseline age (<18 vs  $\geq$ 18 years), and baseline % predicted FEV1 (40 to <65% vs  $\geq$ 65 to 90%).

**Abbreviations:** FEV1 = forced expiratory volume in 1 second, ITT = intent-to-treat, MMRM = mixed-model repeated measures, SD = standard deviation

Total chloride transport responses and hyperpolarizations were observed in similar frequencies in both treatment arms (Supplementary Table 9), and among these other nasal parameters, differences between arms were very small and not statistically significant.

**Supplementary Table 9: Summary of Total Chloride Transport Responders and Hyperpolarizers (ITT Population)**

| Visit, n (%) <sup>a</sup>   | Treatment Arm       |                    |
|-----------------------------|---------------------|--------------------|
|                             | Ataluren<br>(N=116) | Placebo<br>(N=116) |
| Baseline                    |                     |                    |
| Responder <sup>b</sup>      | NA                  | NA                 |
| Hyperpolarizer <sup>c</sup> | 3 (2.6)             | 3 (2.6)            |
| Week 16                     |                     |                    |
| Responder <sup>b</sup>      | 14 (13.3)           | 21 (18.9)          |
| Hyperpolarizer <sup>c</sup> | 4 (3.8)             | 6 (5.4)            |
| Week 32                     |                     |                    |
| Responder <sup>b</sup>      | 15 (15.3)           | 22 (21.4)          |
| Hyperpolarizer <sup>c</sup> | 5 (5.1)             | 12 (11.7)          |
| Week 48                     |                     |                    |
| Responder <sup>b</sup>      | 13 (13)             | 16 (15.4)          |
| Hyperpolarizer <sup>c</sup> | 6 (6.0)             | 6 (5.8)            |

<sup>a</sup> Percentage calculation is based on number of patients in the ITT population who had data available for the assessment of the parameter.

<sup>b</sup> Response = at least a -5 mV improvement in total chloride transport from baseline

<sup>c</sup> Hyperpolarization = total chloride transport value at least as electrically negative as -5 mV

**Abbreviations:** ITT = intent-to-treat, NA = not applicable

In addition to the total chloride transport described in the paper, other nasal parameters assessed by NPD were basal potential difference, sodium transport, intrinsic chloride transport, stimulated chloride transport, total potential difference, and adenosine triphosphate (ATP)-mediated chloride transport. (Supplementary Table 10).

**Supplementary Table 10: Nasal Potential Difference Assessment Parameters (ITT Population)**

| Parameter, Mean Change from Baseline to Week 48, mV (SD) <sup>a</sup> | Treatment Arm    |                 |                      |
|-----------------------------------------------------------------------|------------------|-----------------|----------------------|
|                                                                       | Ataluren (N=116) | Placebo (N=116) | p-value <sup>b</sup> |
| Basal potential difference <sup>c</sup>                               | 5.66 (15.43)     | 3.03 (15.37)    | 0.0774               |
| Sodium transport <sup>d</sup>                                         | -5.20 (12.46)    | -3.52 (12.40)   | 0.1696               |
| Intrinsic chloride transport <sup>e</sup>                             | 0.90 (4.10)      | 0.64 (4.91)     | 0.7538               |
| Stimulated chloride transport <sup>f</sup>                            | -0.59 (3.87)     | -0.50 (3.67)    | 0.9703               |
| Total chloride transport <sup>g</sup>                                 | 0.31 (5.06)      | 0.14 (5.81)     | 0.8587               |
| Total potential difference <sup>h</sup>                               | -4.95 (12.84)    | -3.39 (13.06)   | 0.1729               |
| ATP-mediated chloride transport <sup>i</sup>                          | 2.35 (11.53)     | 2.05 (10.28)    | 0.9081               |

<sup>a</sup> Mean  $\Delta$  from baseline calculation is based on number of patients who had data available for the assessment of the parameter.

<sup>b</sup> P-values were obtained from an MMRM analysis. Covariates were baseline value, treatment, visit, treatment-by-visit interaction, baseline value-by-visit interaction, and the stratification factors of baseline inhaled antibiotics (yes vs no), baseline age (<18 vs  $\geq$ 18 years), and baseline % predicted FEV<sub>1</sub> (40 to <65% vs  $\geq$ 65 to 90%).

<sup>c</sup> Measurement at the end of Ringer's solution

<sup>d</sup> Measurement at end of amiloride solution minus measurement at end of Ringer's solution.

<sup>e</sup> Measurement at end of chloride-free gluconate minus measurement at end of amiloride solution.

<sup>f</sup> Measurement at end of isoproterenol solution minus measurement at end of chloride-free gluconate solution.

<sup>g</sup> Measurement at the end of isoproterenol solution minus measurement at the end of amiloride solution.

<sup>h</sup> Measurement at the end of isoproterenol solution minus measurement at the end of Ringer's solution.

<sup>i</sup> Measurement at the end of ATP solution minus measurement at the end of isoproterenol solution.

**Abbreviations:** ATP = adenosine triphosphate, ITT = intent-to-treat, mV = millivolt

### *General Well Being*

Body weight and BMI were stable over 48 weeks, resulting in a small and not statistically significant difference between treatment groups (body weight  $\Delta=0.04$  kg; BMI  $\Delta=-0.108$ ).

### *Health-Related Quality of Life*

The Cystic Fibrosis Questionnaire-Revised (CFQ-R) respiratory domain is a health-related quality-of-life (HRQL) questionnaire that is scored on a 100-point scale, with higher numbers indicating a lower effect of symptoms on the patient's quality of life. CFQ-R assessed separately for children age 6-13 years, whose questionnaires consisted of the same questions, and for adolescents and adults ( $\geq 14$  years), whose questionnaire consisted of a different set of questions than the 6-13 year olds questions. The difference between ataluren and placebo in mean change of this endpoint was small not statistically significant. In children, the mean change in the CFQ-R respiratory domain score from baseline to Week 48 was -0.7 in the ataluren arm, and -3.6 in the placebo arm ( $\Delta = 2.9$ ,  $p=0.8152$ ). In adolescents and adults, the mean change in the score from baseline to Week 48 was -2.8 for ataluren vs -3.3 for placebo ( $\Delta = 0.5$ ,  $p=0.3723$ ).

### *Cough*

The VivoMetrics LifeShirt® is a measurement device that has been shown to be an objective and a safe method for measuring cough frequency in CF patients.<sup>31</sup> The device includes motion-sensing transducers, electrodes, a microphone, and a 3-axis accelerometer, all of which are housed within a wearable, lightweight vest. A Phase 2 ataluren study (Study 005e) piloted this novel assessment of quantitative cough frequency,<sup>31</sup> which has not been attempted in other CF clinical trials published to date. In Study 005e, a baseline mean [range] awake cough rate of 43 [20-82] coughs/hour was observed (N=18). Based on the limited experience with this outcome measure, cough assessment was included in Study 009. Because coughs were seen in much greater frequency while patients are awake, the pre-specified primary analysis of this tertiary endpoint in Study 009 was the change in awake cough rate. Also collected via the LifeShirt® were changes in total, awake, and asleep cough parameters, ie, rate, duration, intensity, and area under the cough-intensity vs time curve ( $AUC_{\text{cough}}$ ).

The mean change in awake cough hourly rate from baseline to Week 48 was -0.60 coughs per hour for ataluren vs 0.88 coughs/hour for placebo. The difference was not statistically significant ( $p=0.9695$ ). Of note, the baseline mean [range] awake cough rates were substantially lower in this study than in the Phase 2 pilot study: 28 [2, 107] coughs/hour for ataluren and 25 [0.4, 101] coughs/hour for placebo. In the evaluable ITT population ( $N=229$ ), a total of the 99 (43%) patients (47 ataluren and 52 placebo) had a baseline awake cough hourly rate  $<20$  coughs/hour, which was the minimum baseline value observed in the Phase 2 study. Thus, a floor effect may have limited the ability to detect improvements in awake cough hourly rate in this study.

The other parameters assessed by LifeShirt resulted in differences between ataluren and placebo that were small and not of clinical significance.

### *Inflammation*

Sputum and serum inflammatory markers were also assessed as endpoints. The mean change from baseline to Week 48 for sputum interleukin-8 (IL-8) and neutrophil elastase were small in both arms, and the differences between ataluren and placebo at Week 48 were not statistically significant ( $p=0.7966$  and  $p=0.5955$ , respectively).

Concentrations of inflammatory markers, including IL-8 and c-reactive protein (CRP), in serum were assessed. Over 48 weeks, the mean changes were small and the differences between ataluren and placebo were not statistically different at the end of treatment ( $p=0.3115$  and  $p=0.6000$ , respectively). Blood neutrophil levels in whole blood were assessed and the differences between treatment arms at Week 48 were small and not statistically significant ( $p=0.5360$ ).

Also assessed were hepatobiliary inflammatory markers via concentrations of alanine aminotransferase (ALT), aspartate aminotransferase (AST), gamma-glutamyltransferase (GGT), alkaline phosphatase, and total bilirubin in serum. Over 48 weeks, differences in mean changes in ALT, AST, and GTT between ataluren and placebo were small and not statistically significant. Although statistically significant ( $p=0.0160$ ), the difference in total bilirubin between ataluren and placebo was small ( $-0.06$  mg/dL).

### *Computerized Tomography*

Computerized tomography (CT) of the lungs have been utilized as a monitoring tool for CF patients in multiple clinical trials,<sup>35</sup> and has shown potential for assessment of the pulmonary pathology of CF.<sup>35-38</sup> Scoring systems have been devised to convert scan imagery to more useful quantitative numerical data for evaluating disease severity.<sup>36,37</sup> In Study 009, as a tertiary endpoint, changes in lung CT scores were assessed.

A CT scan of the chest was obtained at baseline and at end of treatment (~Week 48) for all study participants. Total lung score was established by the sum of five characteristics from the Brody scoring system<sup>36</sup>; resulting in a total possible score range of 0-40.5. The characteristics scored were bronchiectasis (score range 0 – 12), mucus plugging (score range 0 – 6), peribronchial thickening (score range 0 – 9), parenchyma (score range 0-9), and hyperinflation (score range 0 – 4.5). The average of 2 blinded reviewers was used to determine total lung score and specific subscores, a lower score indicating improvement of the disease.

Baseline (BL) and End of Treatment (EOT) CT scans were obtained for 203 patients in the ITT population who completed 48 weeks of blinded treatment. The difference in total lung score

between the ataluren and placebo groups at Week 48 (-0.28) was not significant (Supplementary Table 11). The mean change from baseline in total lung score at Week 48 was small for the ataluren group ( $0.28 \pm 1.34$ ; n=99) and the placebo group ( $0.56 \pm 1.56$ ; n=104) and was not significant. The changes in total lung scores in patient subgroups of inhaled aminoglycoside use and inhaled antibiotics use also did not reveal significant differences between ataluren and placebo.

An increase in score from baseline to end of treatment would be consistent with the anticipated disease progression but was not seen in the placebo group. Importantly, this lack of change in the placebo group is contrasted to the mean relative change in % predicted FEV<sub>1</sub> of -5.5% seen during the same time period. The lack of change in total lung score in the placebo arm, despite a mean relative change in % predicted FEV<sub>1</sub> of -5.5% seen during the same time period, suggests that morphologic change on CT scan does not parallel functional change in FEV<sub>1</sub> over 48 weeks. The lack of disease progression as observed on CT scan may limit its use in study designs dependent on progressive disease in the placebo arm over 48 weeks.



**Supplementary Table 11: Change in Total Lung CT Score and Subscores (ITT Population)**

| Score, $\pm$ SD          | Ataluren        |                 |                 | Placebo         |                  |                 | $\Delta$ | P-value <sup>1</sup> |
|--------------------------|-----------------|-----------------|-----------------|-----------------|------------------|-----------------|----------|----------------------|
|                          | BL              | EOT             | EOT–BL          | BL              | EOT              | EOT–BL          |          |                      |
| Total Lung (primary)     | 9.53 $\pm$ 3.75 | 9.85 $\pm$ 3.69 | 0.28 $\pm$ 1.34 | 9.62 $\pm$ 3.42 | 10.19 $\pm$ 3.43 | 0.56 $\pm$ 1.56 | -0.28    | 0.833                |
| Bronchiectasis           | 3.00 $\pm$ 1.65 | 3.13 $\pm$ 1.67 | 0.12 $\pm$ 0.62 | 3.02 $\pm$ 1.56 | 3.24 $\pm$ 1.55  | 0.23 $\pm$ 0.73 | -0.11    | 0.359                |
| Air Trapping             | 2.21 $\pm$ 0.70 | 2.28 $\pm$ 0.67 | 0.05 $\pm$ 0.52 | 2.17 $\pm$ 0.72 | 2.29 $\pm$ 0.69  | 0.10 $\pm$ 0.53 | -0.04    | 0.713                |
| Mucus Plugging           | 1.83 $\pm$ 0.83 | 1.89 $\pm$ 0.82 | 0.05 $\pm$ 0.46 | 1.96 $\pm$ 0.83 | 2.03 $\pm$ 0.79  | 0.06 $\pm$ 0.44 | -0.02    | 0.568                |
| Parenchyma               | 0.72 $\pm$ 0.43 | 0.73 $\pm$ 0.38 | 0.02 $\pm$ 0.28 | 0.72 $\pm$ 0.41 | 0.75 $\pm$ 0.39  | 0.02 $\pm$ 0.33 | 0.00     | 0.971                |
| Peribronchial Thickening | 1.77 $\pm$ 0.90 | 1.82 $\pm$ 0.91 | 0.04 $\pm$ 0.39 | 1.75 $\pm$ 0.83 | 1.89 $\pm$ 0.81  | 0.15 $\pm$ 0.49 | -0.11    | 0.125                |

P-value for the Total Lung score is based on nonparametric Rank ANCOVA; other p-values are based on an ANCOVA analysis.

Abbreviations: BL = baseline, EOT = end of treatment, ITT = intent to treat, SD = standard deviation

### *Effect of Antibiotics on Readthrough Activity of Ataluren In Vitro*

Since aminoglycoside antibiotics have been reported to bind to ribosomal RNA, this study was designed to evaluate the effect of antibiotics on the readthrough activity of ataluren in a nonsense-mutation-containing in vitro reporter system.

#### **Methods and results**

Four antibiotics were selected for analysis that included two aminoglycosides (gentamicin and tobramycin) and two nonaminoglycoside antibiotics (aztreonam and colistin), reflecting the antibiotics used in the Phase 3 clinical trial. Tobramycin and gentamicin both interact with prokaryotic ribosomal RNA<sup>38,39</sup> and are reported to demonstrate nonsense suppression (i.e. ribosomal readthrough) activity in an in vitro eukaryotic system.<sup>39,40</sup>

A luciferase reporter construct containing an intron, a premature termination codon and a FLAGepitope tag was stably transfected into human embryonic kidney cells (HEK293 LUC-190 FLAG). Activity was determined using BrightGlo (Promega, Madison WI).<sup>41</sup>

The antibacterial activity of each antibiotic was tested on a panel of sensitive bacterial strains and shown to be active (data not shown). The cytotoxicity of each compound was determined after treatment for 20 hours; no cytotoxicity was observed (Supplementary Figure 2 panel C).

To evaluate the effect of ataluren in combination with antibiotics, the antibiotic concentration that resulted in maximal readthrough activity or that was not cytotoxic was utilized. For tobramycin, a concentration of 10 µg/mL was used based on the work of Keeling 2002 (Figure 3B).<sup>42</sup> For gentamicin, a concentration of 3 mg/mL was used. For both aztreonam and colistin, a concentration of 100 µg/mL was used. Cells harboring the luciferase reporter (HEK293 LUC-190 FLAG) were grown in Dulbecco's Modified Eagle Media (DMEM) containing 10% fetal

bovine serum (FBS) at 37°C and 5% CO<sub>2</sub>. The combination of each antibiotic with ataluren (169 pg/mL to 3.3 µg/mL; 55 nM to 11 µM) was added to the cells and incubated for 20 hours. The dose response curves for ataluren with and without the two aminoglycosides are shown in Supplementary Figures 2A and 2B. The decrease in activity was not due to cytotoxicity (Supplementary Figure 2C).

**Supplementary Figure 2: Aminoglycoside antibiotics reduce ataluren activity in the cell-based reporter assay.**

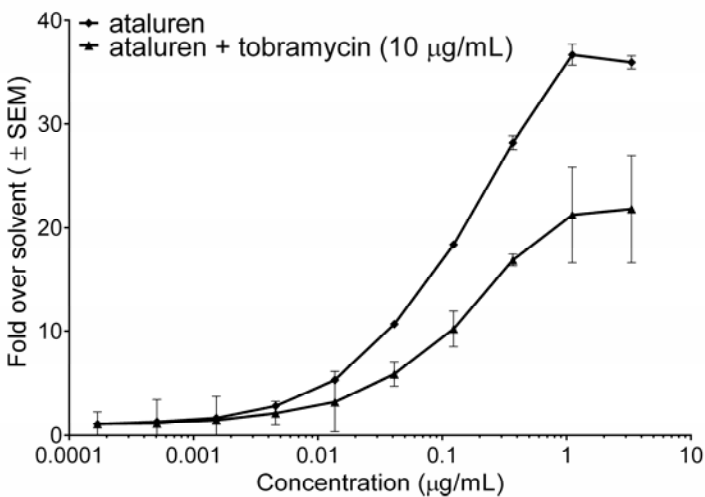

A) HEK293 LUC-190 FLAG cells were incubated with ataluren alone (169 pg/mL to 3.3 µg/mL) and in combination with tobramycin (10 µg/mL).

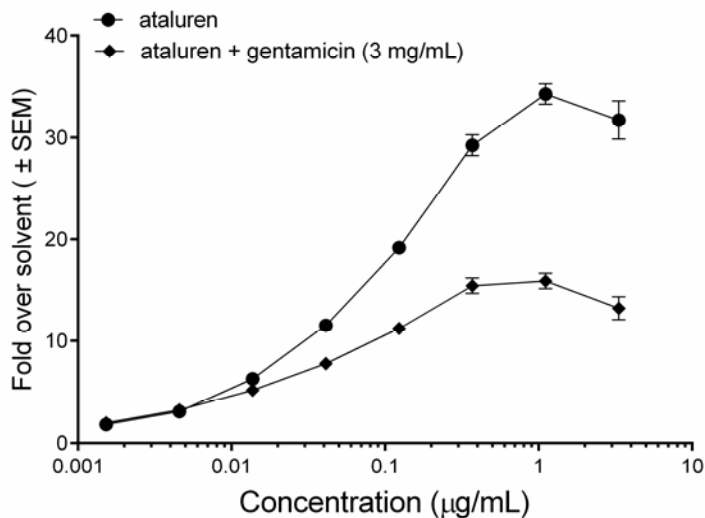

B) HEK293 LUC-190 FLAG cells were incubated with ataluren alone (1.5 ng/mL to 3.3  $\mu$ g/mL) and in combination with gentamicin (3 mg/mL).

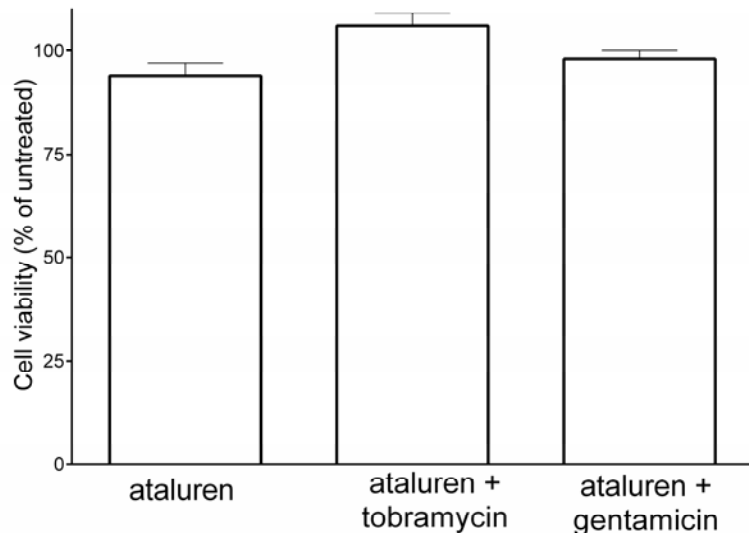

C) Cell viability of HEK293 LUC-190 FLAG cells incubated with ataluren alone (3.3  $\mu$ g/mL) and in combination with tobramycin (10  $\mu$ g/mL) or gentamicin (3 mg/mL) is not affected. Abbreviation: SEM = standard error of the mean.

To determine whether ataluren antagonizes the antimicrobial activity of tobramycin, ataluren was tested in combination with tobramycin. Ataluren and tobramycin were dissolved in DMSO at a concentration 40-fold higher than the highest concentration tested. The DMSO was then serially diluted 2-fold in DMSO to generate diluted stock solutions that were added to the 96-well plates, in duplicate, at a 1:40 dilution. Prior to testing, *P. aeruginosa* bacteria were isolated on agar plates to ensure that a monoclonal population was used. Logarithmically growing cells were diluted to approximately  $5 \times 10^5$  colony forming units (CFU)/mL and subjected to test compounds solubilized and serially diluted in DMSO, with a final DMSO concentration of 2.5%. After 18 hours of incubation at 37°C, the optical density at 600 nm ( $OD_{600}$ ) was determined by reading the 96-well microtiter plates on a plate reader. For a given concentration, a minimum inhibitory concentrations (MIC) determination was noted if:  $[\text{OD}_{600} \text{ Control} - \text{OD}_{600} \text{ Test Concentration}] / [\text{OD}_{600} \text{ Control} - \text{OD}_{600} \text{ Media}] \times 100 \geq 90\%$ , which correlated with no observable turbidity.

As shown in Supplementary Table 12, the MICs for ataluren (PTC124, sodium salt form) were >250 µg/mL, indicating a lack of antibacterial activity at all testing concentrations up to and including 250 µg/mL. The MIC for tobramycin was ~0.4 µg/mL when tested alone, and was not changed in the presence of ataluren concentrations ranging from 0.24 to 125 µg/mL.

**Supplementary Table 12: MICs for Tobramycin Against *P. aeruginosa* When Tested in the Presence and Absence of Ataluren**

| Compound   | MIC (µg/mL) | Ataluren concentration (µg/mL) |
|------------|-------------|--------------------------------|
| tobramycin | 0.39        | 0                              |
| tobramycin | 0.39        | 0.24                           |
| tobramycin | 0.39        | 0.49                           |
| tobramycin | 0.78        | 0.98                           |
| tobramycin | 0.39        | 1.95                           |
| tobramycin | 0.78        | 3.91                           |
| tobramycin | 0.39        | 7.81                           |
| tobramycin | 0.78        | 15.63                          |
| tobramycin | 0.39        | 31.25                          |
| tobramycin | 0.39        | 62.5                           |
| tobramycin | 0.39        | 125                            |
| ataluren   | >250        | 250                            |

### Conclusion

The data demonstrate that the ability of ataluren to enable readthrough is reduced in the presence of antibiotics that are known to interact with ribosomal RNA (gentamicin and tobramycin), but not in the presence of antibiotics that act through alternative mechanisms (aztreonam and colistin). The reduced activity is not due to effects on cell viability. Conversely, ataluren did not affect the antibacterial activity of tobramycin as tested against *Pseudomonas aeruginosa*.

*Adverse Events*

Treatment-emergent adverse events occurring at a by-patient frequency  $\geq 10\%$  are shown in Supplementary Table 13. The most common types of disorders were respiratory, thoracic and mediastinal disorders; infections and infestations; gastrointestinal disorders. Most treatment-emergent adverse events were mild (Grade 1) or moderate (Grade 2) in severity

**Supplementary Table 13: Treatment-Emergent Adverse Events with a Patient Frequency of  $>10\%$  by System Organ Class (As-Treated Population)**

| MedDRA System Organ Class/Preferred Term <sup>a</sup> ,<br>n (%) | Treatment Arm      |                    | All Patients<br>N=238 |
|------------------------------------------------------------------|--------------------|--------------------|-----------------------|
|                                                                  | Ataluren           | Placebo            |                       |
|                                                                  | N=120              | N=118              |                       |
| <b>Gastrointestinal disorders</b>                                | <b>58 (48.3%)</b>  | <b>51 (43.2%)</b>  | <b>109 (45.8%)</b>    |
| Diarrhoea                                                        | 13 (10.8%)         | 21 (17.8%)         | 34 (14.3%)            |
| Abdominal pain                                                   | 18 (15.0%)         | 15 (12.7%)         | 33 (13.9%)            |
| Vomiting                                                         | 14 (11.7%)         | 10 (8.5%)          | 24 (10.1%)            |
| Nausea                                                           | 11 (9.2%)          | 12 (10.2%)         | 23 (9.7%)             |
| <b>General disorders and administration site conditions</b>      | <b>33 (27.5%)</b>  | <b>34 (28.8%)</b>  | <b>67 (28.2%)</b>     |
| Pyrexia                                                          | 18 (15.0%)         | 21 (17.8%)         | 39 (16.4%)            |
| <b>Infections and infestations</b>                               | <b>76 (63.3%)</b>  | <b>77 (65.3%)</b>  | <b>153 (64.3%)</b>    |
| Viral upper respiratory tract infection                          | 21 (17.5%)         | 29 (24.6%)         | 50 (21.0%)            |
| Sinusitis                                                        | 15 (12.5%)         | 14 (11.9%)         | 29 (12.2%)            |
| Rhinitis                                                         | 12 (10.0%)         | 12 (10.2%)         | 24 (10.1%)            |
| Upper respiratory tract infection                                | 5 (4.2%)           | 12 (10.2%)         | 17 (7.1%)             |
| <b>Nervous system disorders</b>                                  | <b>27 (22.5%)</b>  | <b>23 (19.5%)</b>  | <b>50 (21.0%)</b>     |
| Headache                                                         | 20 (16.7%)         | 14 (11.9%)         | 34 (14.3%)            |
| <b>Renal and urinary disorders</b>                               | <b>21 (17.5%)</b>  | <b>5 (4.2%)</b>    | <b>26 (10.9%)</b>     |
| Acute kidney injury <sup>b</sup>                                 | <b>18 (15.0%)</b>  | <b>1 (0.01%)</b>   | <b>19 (0.08%)</b>     |
| <b>Respiratory, thoracic and mediastinal disorders</b>           | <b>105 (87.5%)</b> | <b>111 (94.1%)</b> | <b>216 (90.8%)</b>    |
| Pulmonary exacerbation                                           | 92 (76.7%)         | 94 (79.7%)         | 186 (78.2%)           |
| Cough                                                            | 26 (21.7%)         | 35 (29.7%)         | 61 (25.6%)            |
| Haemoptysis                                                      | 11 (9.2%)          | 18 (15.3%)         | 29 (12.2%)            |

| MedDRA System Organ Class/Preferred Term <sup>a</sup> ,<br>n (%) | Treatment Arm |            | All Patients |
|------------------------------------------------------------------|---------------|------------|--------------|
|                                                                  | Ataluren      | Placebo    |              |
|                                                                  | N=120         | N=118      | N=238        |
| Productive cough                                                 | 12 (10.0%)    | 11 (9.3%)  | 23 (9.7%)    |
| Oropharyngeal pain                                               | 4 (3.3%)      | 14 (11.9%) | 18 (7.6%)    |

<sup>a</sup> Adverse events with a frequency of >10% in either treatment arm are displayed alphabetically by MedDRA System Organ Class and from highest to lowest incidence across both treatment arms within each System Organ Class. Patients who had the same adverse event more than once are counted only once for that adverse event. Adverse events with a frequency of ≤10% across both treatment arms are not shown.

<sup>b</sup> Includes reported terms including renal failure, acute renal failure, renal impairment, and hypercreatininaemia.

## REFERENCES

31. Kerem E, Wilschanski M, Miller NL, et al. Ambulatory quantitative waking and sleeping cough assessment in patients with cystic fibrosis. *J Cyst Fibros*. 2011 May;10(3):193-200.
32. Brody AS. Computed tomography scanning in cystic fibrosis research trials: practical lessons from three clinical trials in the United States. *Proc Am Thorac Soc*. 2007 Aug 1;4(4):350-4.
33. Robinson TE. Computed tomography scanning techniques for the evaluation of cystic fibrosis lung disease. *Proc Am Thorac Soc*. 2007 Aug 1;4(4):310-5.
34. Tiddens HA, de Jong PA. Imaging and clinical trials in cystic fibrosis. *Proc Am Thorac Soc*. 2007 Aug 1;4(4):343-6.
35. Brody AS, Klein JS, Molina PL, Quan J, Bean JA, Wilmott RW. High-resolution computed tomography in young patients with cystic fibrosis: distribution of abnormalities and correlation with pulmonary function tests. *J Pediatr*. 2004 Jul;145(1):32-8.
36. Brody AS, Kosorok MR, Li Z, Broderick LS, Foster JL, Laxova A, Bandla H, Farrell PM. Reproducibility of a scoring system for computed tomography scanning in cystic fibrosis. *J Thorac Imaging*. 2006 Mar;21(1):14-21.
37. de Jong PA, Tiddens HA. Cystic fibrosis specific computed tomography scoring. *Proc Am Thorac Soc*. 2007 Aug 1;4(4):338-42.
38. Le Goffic F, Capmau ML, Tangy F, Baillarge M. Mechanism of action of aminoglycoside antibiotics. Binding studies of tobramycin and its 6'-N-acetyl derivative to the bacterial ribosome and its subunits. *Eur J Biochem*. 1979;102(1):73-81.
39. Manuvakhova M, Keeling K, Bedwell DM. Aminoglycoside antibiotics mediate context-dependent suppression of termination codons in a mammalian translation system. *RNA*. 2000 Jul;6(7):1044-55.
40. Keeling KM, Bedwell DM. Clinically relevant aminoglycosides can suppress disease-associated premature stop mutations in the IDUA and P53 cDNAs in a mammalian translation system. *J Mol Med (Berl)*. 2002;80(6):367-76
41. Gould SJ, Subramani S. Firefly luciferase as a tool in molecular and cell biology. *Anal Biochem*. 1988;175(1):5-13.
42. Keeling KM, Bedwell DM. Clinically relevant aminoglycosides can suppress disease-associated premature stop mutations in the IDUA and P53 cDNAs in a mammalian translation system. *J Mol Med (Berl)*. 2002;80(6):367-76.



**The Cystic Fibrosis Ataluren Study Group:**

| <u>Name</u>                     | <u>Affiliation</u>                                                                                                                                                                                                                    |
|---------------------------------|---------------------------------------------------------------------------------------------------------------------------------------------------------------------------------------------------------------------------------------|
| Frank Accurso, MD               | Children's Hospital Colorado<br>13123 E 16th Ave, Aurora, CO 80045                                                                                                                                                                    |
| Moira Aitken, MD                | University of Washington, Seattle<br>Pulmonary and Critical Care Medicine<br>1959 N.E. Pacific, Seattle, WA 98195                                                                                                                     |
| Carmen Antelo, MD               | Hospital Universitario La Paz, Spain<br>Sección de Neumología Pediátrica<br>Paseo de la Castellana, 261<br>28046 Madrid, Spain                                                                                                        |
| Kris De Boeck, MD, PhD          | University Hospitals Leuven/Catholic University of Leuven<br>Department of Respiratory Medicine<br>Gasthuisberg, Herestraat 49<br>3000 Leuven, Belgium                                                                                |
| Francois Bremont, MD            | Hôpital des enfants<br>Pneumo-Allergologie<br>CHU de Toulouse<br>330 Avenue de Grande Bretagne - TSA 70034<br>31059 Toulouse, Cedex 9<br>France                                                                                       |
| Inez Bronsveld, MD PhD          | Dept. of Pulmonology and Tuberculosis<br>University Medical Centre<br>CF Centrum - Locatie AZU<br>Polikliniek Longziekten<br>UMC Utrecht - Universitair Medisch Centrum Utrecht<br>Heidelberglaan 100<br>3584 CX Utrecht, Netherlands |
| Georges Casimir, MD, PhD        | Pulmonology-Allergology and Cystic Fibrosis Department<br>Hôpital Universitaire des Enfants Reine Fabiola – HUDERF<br>Avenue J.J. Crocqlaan 15<br>1020 Brussels, Belgium                                                              |
| Terry Chin, MD                  | Miller Children's Hospital, PDP<br>2801 Atlantic Ave, Long Beach, California 90806                                                                                                                                                    |
| J C Davies, MB, ChB, MRCPCH, MD | Department of Gene Therapy, Imperial College London, Manresa                                                                                                                                                                          |

| <b><u>Name</u></b>        | <b><u>Affiliation</u></b>                                                                                                                                                                           |
|---------------------------|-----------------------------------------------------------------------------------------------------------------------------------------------------------------------------------------------------|
|                           | Road, London SW3 6LR, UK                                                                                                                                                                            |
| Allen Dozor, MD           | Children's Environmental Health Center of the Hudson Valley<br>19 Bradhurst Avenue, Suite 2400 -Hawthorne, New York 10532                                                                           |
| J S Elborn, Prof.         | Centre for Infection and Immunity, Queen's University, Belfast<br>Health Sciences Building<br>97 Lisburn Road<br>Belfast BT9 7BL                                                                    |
| Isabelle Fajac, MD, PhD   | Department of Physiology, Hôpital Cochin, AP-HP<br>Faculté de médecine, université Paris-Descartes, Sorbonne Paris<br>Cité, 75006 Paris, France                                                     |
| Maria Franco, MD          | Miami Children's Hospital<br>Pediatric Pulmonology<br>Miami Children's Hospital<br>3100 SW 62nd Avenue, Miami, Florida 33155                                                                        |
| Lena Hjelte, MD           | Stockholm CF Center<br>B 59, Karolinska University Hospital, Huddinge, SE-141 86<br>Stockholm, Sweden                                                                                               |
| Eitan Kerem, MD           | Hadassah Hebrew University Medical Center<br>Hadassah Medical Organization, Kiryat Hadassah, P.O.B 12000,<br>91120 Jerusalem, Israel                                                                |
| Christiane Knoop, MD, PhD | Hopital Erasme and Clinique Universitaire Saint-Luc<br>808 Lennik St., B-1070, Brussels, Belgium<br><br>Cliniques Universitaires Saint-Luc (UCL)<br>Avenue Hippocrate, 10, B-1200 Brussels, Belgium |
| Michael Konstan, MD       | University Hospitals Case Medical Center/ Rainbow Babies &<br>Children's Hospital<br>11100 Euclid Ave, Cleveland, OH 44106                                                                          |
| Michael Light, MD         | University of Miami Hospitals and Clinics<br>1475 N W 12th Ave, Miami, FL 3310                                                                                                                      |
| Anne Malfroot, MD, PhD    | Universitair Ziekenhuis Brussel<br>Laarbeeklaan 101, 1090 Brussels, Belgium<br><br>Clinique Universitaire Saint-Luc<br>Avenue Hippocrate, 10, B-1200 Brussels, Belgium                              |

| <b><u>Name</u></b>       | <b><u>Affiliation</u></b>                                                                                                                                                                                                         |
|--------------------------|-----------------------------------------------------------------------------------------------------------------------------------------------------------------------------------------------------------------------------------|
| Susanna McColley, MD     | Children's Memorial Hospital PUL<br>2300 N Childrens Plz<br>Chicago, IL 60614                                                                                                                                                     |
| Paola Melotti, MD, PhD   | Cystic Fibrosis Center-Azienda Ospedaliera di Verona, piazzale Stefani, 1-37126 Verona, Italy                                                                                                                                     |
| Richard Moss, MD         | Stanford University Clinical & Translational Research Unit<br>Freidenrich Center for Translational Research<br>800 Welch Rd, Stanford University, Palo Alto, CA 94304                                                             |
| Mark Pian, MD            | University of California, San Diego – Hillcrest Hospital<br>200 W Arbor Dr, San Diego, CA 92103                                                                                                                                   |
|                          | University of California, San Diego – Thornton Hospital<br>9300 Campus Point Dr, La Jolla, CA 92037                                                                                                                               |
|                          | University of California, San Diego – Rady Children’s Hospital<br>Department of Pediatrics<br>UCSD Pediatric Pharmacology Research Unit<br>3020 Children's Way, MC 5109, San Diego, CA 92123                                      |
| Joseph Pilewski, MD      | Children’s Hospital of Pittsburgh of UPMC<br>4401 Penn Ave, Pittsburgh, PA 15224                                                                                                                                                  |
| Serena Quattrucci, PhD   | Centro regionale di riferimento Fibrosi Cistica, Univ. La Sapienza<br>– Policlinico, Umberto I, Dipartimento di pediatria<br>Piazzale Aldo Moro, 5, 00185 Rome, Italy                                                             |
| Felix Ratjen, MD, PhD    | The Hospital for Sick Children, Toronto<br>Pediatric Respiratory Medicine<br>555 University Ave, Toronto, ON M5G 1X8, Canada                                                                                                      |
| George Retsch-Bogart, MD | University of North Carolina Hospitals, University of North Carolina at Chapel Hill, Cystic Fibrosis Pulmonary Research and Treatment Center<br>CB# 7020, 130 Mason Farm Rd, 4th Floor Bioinformatics Bldg, Chapel Hill, NC 27599 |
| Ernst Rietschel MD       | Cystic Fibrosis Centre, Children’s Hospital, University of Cologne, Kerpenerstrasse 62, 50924 Cologne, Germany                                                                                                                    |
| Daniel Rosenbluth, MD    | Center for Applied Research Sciences<br>Washington University School of Medicine                                                                                                                                                  |

| <b><u>Name</u></b>                | <b><u>Affiliation</u></b>                                                                                                                                                                                                       |
|-----------------------------------|---------------------------------------------------------------------------------------------------------------------------------------------------------------------------------------------------------------------------------|
|                                   | 660 S Euclid Ave, St Louis, MO 63110                                                                                                                                                                                            |
| Steven M. Rowe, MD MSPH           | Division of Pulmonary, Allergy & Critical Care Medicine<br>1530 3rd Avenue So, THT-422, University of Alabama at<br>Birmingham, Birmingham, AL 35294                                                                            |
| Gregory Sawicki, MD               | Children's Hospital, Boston<br>Pediatric Pulmonology<br>300 Longwood Ave, Boston, MA 02115                                                                                                                                      |
| Michael Schechter, MD             | Emory Cystic Fibrosis Center, Atlanta<br>1547 Clifton Rd NE, Atlanta, GA 30322                                                                                                                                                  |
| Isabelle Sermet-Gaudelus, MD, PhD | Centre de Ressource et de Competence de la Mucoviscidose,<br>Service de Pediatrie Generale, Service de Radiologie Pediatrique,<br>CHU Paris - Hôpital Necker-Enfants Malades<br>149 Rue de Sèvres, 75743 Paris Cedex 15, France |
| Kevin Southern, MB, ChB, PhD      | Institute of Translational Medicine (Child Health), University of<br>Liverpool, Alder Hey Children's NHS Foundation Trust,<br>Eaton Road, Liverpool L12 2AP, UK                                                                 |
| Patricia Walker, MD               | The Cystic Fibrosis Center, Beth Israel Medical Center, NY<br>10 Nathan D Perlman Pl, New York, NY 10003                                                                                                                        |
| Pamela Zeitlin, MD, PhD           | The Johns Hopkins Hospital<br>Pulmonary Medicine<br>200 N. Wolfe Street, Baltimore, MD 21287                                                                                                                                    |
